# Supplementary material
Source: ML conference proceedings conference paper supplement (https://proceedings.neurips.cc/paper_files/paper/2020/hash/6811f9b2bf86bf64e3f320973119b959-Abstract.html)
Supplement: Supplementary file [file 6811f9b2bf86bf64e3f320973119b959-Supplemental.pdf]

## Supplementary Material

**Proofs** This section provides some formal justification, absent from the main text, for several theoretical results.

*Proof of Lemma 1.* For  $a, b, c, d > 0$ , the inequality  $a + b \leq a((c + d)/c)^{1-q} + b((c + d)/d)^{1-q}$  written for  $a = x_j, b = x'_j, c = (\mathbf{Z}\mathbf{x})_j$ , and  $d = (\mathbf{Z}\mathbf{x}')_j$  and rearranged yields

$$\frac{x_j + x'_j}{(\mathbf{Z}(\mathbf{x} + \mathbf{x}'))_j^{1-q}} \leq \frac{x_j}{(\mathbf{Z}\mathbf{x})_j^{1-q}} + \frac{x'_j}{(\mathbf{Z}\mathbf{x}')_j^{1-q}}, \quad (22)$$

which remains true if  $x_i = 0$  or  $x'_j = 0$  (or both). Summing over  $j \in [1 : N]$  gives the result.  $\square$

*Proof of Theorem 2.* We start by recalling that, given a convex subset  $\mathcal{C}$  and a twice continuously differentiable function  $f$  defined on  $\mathcal{C}$ , the function  $f$  is convex, respectively concave, if and only if its Hessian is positive semidefinite on  $\text{int}(\mathcal{C})$ , respectively negative semidefinite on  $\text{int}(\mathcal{C})$ . We take here  $\mathcal{C} = \mathbb{R}_+^N$  and  $f(\mathbf{x}) = \|\mathbf{x}\|_{\mathbf{Z},q}^q = \sum_{k=1}^N x_k (\mathbf{Z}\mathbf{x})_k^{q-1}$  for  $\mathbf{x} \in \mathbb{R}_+^N$ . Based on  $\partial(\mathbf{Z}\mathbf{x})_k/\partial x_i = Z_{k,i}$ , a standard calculation gives

$$\frac{\partial f}{\partial x_i} = (\mathbf{Z}\mathbf{x})_i^{q-1} - (1-q) \sum_k Z_{k,i} x_k (\mathbf{Z}\mathbf{x})_k^{q-2}, \quad (23)$$

$$\frac{\partial f}{\partial x_j \partial x_i} = -(1-q) [Z_{i,j} (\mathbf{Z}\mathbf{x})_i^{q-2} + Z_{j,i} (\mathbf{Z}\mathbf{x})_j^{q-2} - (2-q) \sum_k Z_{k,i} Z_{k,j} x_k (\mathbf{Z}\mathbf{x})_k^{q-3}]. \quad (24)$$

Thus, setting  $\mathbf{D}(\mathbf{x}) = \text{diag}[(\mathbf{Z}\mathbf{x})_\ell^{q-2}, \ell = 1, \dots, N]$  and  $\mathbf{D}'(\mathbf{x}) = \text{diag}[x_\ell (\mathbf{Z}\mathbf{x})_\ell^{q-3}, \ell = 1, \dots, N]$ , concavity holds if and only if  $\mathbf{M}(\mathbf{x}) := \mathbf{D}(\mathbf{x})\mathbf{Z} + \mathbf{Z}^\top \mathbf{D}(\mathbf{x}) - (2-q)\mathbf{Z}^\top \mathbf{D}'(\mathbf{x})\mathbf{Z} \succeq \mathbf{0}$  for all  $\mathbf{x} \in \text{int}(\mathbb{R}_+^N)$ , while convexity holds if and only if  $\mathbf{M}(\mathbf{x}) \preceq \mathbf{0}$  for all  $\mathbf{x} \in \text{int}(\mathbb{R}_+^N)$ . We are going to show that  $\mathbf{M}(\mathbf{x}) \succeq \mathbf{0}$  for all  $\mathbf{x} \in \text{int}(\mathbb{R}_+^N)$  whenever  $\|\mathbf{Z} - \mathbf{I}\|_{2 \rightarrow 2} \leq q/2$  and that there is no  $\mathbf{x} \in \text{int}(\mathbb{R}_+^N)$  for which  $\mathbf{M}(\mathbf{x}) \preceq \mathbf{0}$  when  $\mathbf{Z}$  is symmetric. We shall establish the latter result first. Dropping the dependence of  $\mathbf{M}$  on  $\mathbf{x} \in \text{int}(\mathbb{R}_+^N)$  for ease of notation, we observe that

$$M_{i,i} = 2(\mathbf{Z}\mathbf{x})_i^{q-2} - (2-q) \sum_k Z_{k,i}^2 x_k (\mathbf{Z}\mathbf{x})_k^{q-3}. \quad (25)$$

Choosing  $i \in [1 : N]$  such that  $(\mathbf{Z}\mathbf{x})_i^{q-3} = \max_{k \in [1:N]} (\mathbf{Z}\mathbf{x})_k^{q-3}$  and keeping in mind that  $Z_{k,i}^2 \leq Z_{k,i}$  since  $Z_{k,i} \in [0, 1]$ , we obtain

$$M_{i,i} \geq 2(\mathbf{Z}\mathbf{x})_i^{q-2} - (2-q) \left( \sum_k Z_{k,i} x_k \right) (\mathbf{Z}\mathbf{x})_i^{q-3} \quad (26)$$

$$= 2(\mathbf{Z}\mathbf{x})_i^{q-2} - (2-q) (\mathbf{Z}^\top \mathbf{x})_i (\mathbf{Z}\mathbf{x})_i^{q-3} = q(\mathbf{Z}\mathbf{x})_i^{q-2} > 0. \quad (27)$$

The matrix  $\mathbf{M}$ , having a positive diagonal element, cannot be negative semidefinite, as announced. To establish that it is positive semidefinite when  $\mathbf{Z}$  is close to  $\mathbf{I}$ , we shall prove that  $\langle \mathbf{M}\mathbf{v}, \mathbf{v} \rangle \geq 0$  for all  $\mathbf{v} \in \mathbb{R}^N$ . Also dropping the dependence of  $\mathbf{D}$  and  $\mathbf{D}'$  on  $\mathbf{x} \in \text{int}(\mathbb{R}_+^N)$ , we write

$$\langle \mathbf{M}\mathbf{v}, \mathbf{v} \rangle = \langle \mathbf{D}\mathbf{Z}\mathbf{v}, \mathbf{v} \rangle + \langle \mathbf{Z}^\top \mathbf{D}\mathbf{v}, \mathbf{v} \rangle - (2-q) \langle \mathbf{Z}^\top \mathbf{D}'\mathbf{Z}\mathbf{v}, \mathbf{v} \rangle \quad (28)$$

$$= 2\langle \mathbf{D}\mathbf{v}, \mathbf{Z}\mathbf{v} \rangle - (2-q) \langle \mathbf{D}'\mathbf{Z}\mathbf{v}, \mathbf{Z}\mathbf{v} \rangle \geq 2\langle \mathbf{D}\mathbf{v}, \mathbf{Z}\mathbf{v} \rangle - (2-q) \langle \mathbf{D}\mathbf{Z}\mathbf{v}, \mathbf{Z}\mathbf{v} \rangle, \quad (29)$$

where the last step used the fact that  $\mathbf{D}' \preceq \mathbf{D}$  (by virtue of  $x_\ell \leq (\mathbf{Z}\mathbf{x})_\ell$  for all  $\ell \in [1 : N]$ , see (5)). Decomposing  $\mathbf{Z}$  as  $\mathbf{Z} = \mathbf{I} + \tilde{\mathbf{Z}}$  (with  $\tilde{\mathbf{Z}} \succeq \mathbf{0}$ ), a straightforward calculation and then the Cauchy–Schwarz inequality gives

$$\langle \mathbf{M}\mathbf{v}, \mathbf{v} \rangle \geq q\langle \mathbf{D}\mathbf{v}, \mathbf{v} \rangle - 2(1-q)\langle \mathbf{D}\mathbf{v}, \tilde{\mathbf{Z}}\mathbf{v} \rangle - (2-q)\langle \mathbf{D}\tilde{\mathbf{Z}}\mathbf{v}, \tilde{\mathbf{Z}}\mathbf{v} \rangle \quad (30)$$

$$\geq q\langle \mathbf{D}\mathbf{v}, \mathbf{v} \rangle - 2(1-q)\langle \mathbf{D}\mathbf{v}, \mathbf{v} \rangle^{1/2} \langle \mathbf{D}\tilde{\mathbf{Z}}\mathbf{v}, \tilde{\mathbf{Z}}\mathbf{v} \rangle^{1/2} - (2-q)\langle \mathbf{D}\tilde{\mathbf{Z}}\mathbf{v}, \tilde{\mathbf{Z}}\mathbf{v} \rangle. \quad (31)$$

Let us for the moment make the assumption that

$$\langle \mathbf{D}\tilde{\mathbf{Z}}\mathbf{v}, \tilde{\mathbf{Z}}\mathbf{v} \rangle \leq \frac{q^2}{4} \langle \mathbf{D}\mathbf{v}, \mathbf{v} \rangle \quad \text{for all } \mathbf{v} \in \mathbb{R}^N. \quad (32)$$

This assumption allows us to derive that, for all  $\mathbf{v} \in \mathbb{R}^N$ ,

$$\langle \mathbf{M}\mathbf{v}, \mathbf{v} \rangle \geq q \left( 1 - (1-q) - \frac{(2-q)q}{4} \right) \langle \mathbf{D}\mathbf{v}, \mathbf{v} \rangle \geq q \left( q - \frac{q}{2} \right) \langle \mathbf{D}\mathbf{v}, \mathbf{v} \rangle \geq 0, \quad (33)$$

i.e., that  $\mathbf{M} \succeq \mathbf{0}$ , as announced. It now remains to verify (32). Stated as  $\tilde{\mathbf{Z}}^\top \mathbf{D} \tilde{\mathbf{Z}} \preceq (q^2/4) \mathbf{D}$ , it also reads, after multiplying on both sides by  $\mathbf{D}^{-1/2}$ ,

$$\mathbf{C}^\top \mathbf{C} \preceq \frac{q^2}{4} \mathbf{I}, \quad \mathbf{C} := \mathbf{D}^{1/2} \tilde{\mathbf{Z}} \mathbf{D}^{-1/2}. \quad (34)$$

This is equivalent to  $\lambda_i(\mathbf{C}^\top \mathbf{C}) = \sigma_i(\mathbf{C})^2 \leq q^2/4$  for all  $i \in [1 : N]$ , i.e., to  $\sigma_{\max}(\mathbf{C}) \leq q/2$ . In view of  $\sigma_{\max}(\mathbf{C}) = \sigma_{\max}(\mathbf{D}^{1/2} \tilde{\mathbf{Z}} \mathbf{D}^{-1/2}) = \sigma_{\max}(\tilde{\mathbf{Z}}) = \|\tilde{\mathbf{Z}}\|_{2 \rightarrow 2} = \|\mathbf{Z} - \mathbf{I}\|_{2 \rightarrow 2}$ , this indeed reduces to the announced condition  $\|\mathbf{Z} - \mathbf{I}\|_{2 \rightarrow 2} \leq q/2$ .  $\square$

*Proof of Proposition 3.* Since the minimum of a concave function on a convex set is achieved at an extreme point of the set, there is a minimizer  $\mathbf{x}^\sharp$  of (MinDiv) which is a vertex of the polygonal set  $\Delta^N \cap \mathbf{A}^{-1}(\{\mathbf{y}\}) = \underline{\mathbf{x}} + \{\mathbf{u} \in \ker \mathbf{A} : \underline{\mathbf{x}} + \mathbf{u} \geq 0\}$ . This set has dimension  $d \geq N - m$ . Since a vertex is obtained by turning  $d$  of the  $N$  inequalities  $x_j + u_j \geq 0$  into equalities, we see that  $x_j^\sharp$  is positive  $N - d \leq m$  times, i.e., that  $\mathbf{x}^\sharp$  is  $m$ -sparse. The inequality  $\|\mathbf{x}^\sharp\|_{\mathbf{Z}, q}^q \leq m$  follows from (8).  $\square$

*Proof of Proposition 4.* We simply write, using Hölder's inequality and the defining property of  $\mathbf{x}^{(n+1)}$ ,

$$\begin{aligned} \sum_{k=1}^K (\tilde{x}_k^{(n+1)} + \varepsilon)^q &= \sum_{k=1}^K \frac{(\tilde{x}_k^{(n+1)} + \varepsilon)^q}{(\tilde{x}_k^{(n)} + \varepsilon)^{q(1-q)}} (\tilde{x}_k^{(n)} + \varepsilon)^{q(1-q)} \\ &\leq \left[ \sum_{k=1}^K \frac{\tilde{x}_k^{(n+1)} + \varepsilon}{(\tilde{x}_k^{(n)} + \varepsilon)^{1-q}} \right]^q \left[ \sum_{k=1}^K (\tilde{x}_k^{(n)} + \varepsilon)^q \right]^{1-q} \\ &\leq \left[ \sum_{k=1}^K \frac{\tilde{x}_k^{(n)} + \varepsilon}{(\tilde{x}_k^{(n)} + \varepsilon)^{1-q}} \right]^q \left[ \sum_{k=1}^K (\tilde{x}_k^{(n)} + \varepsilon)^q \right]^{1-q} \\ &= \sum_{k=1}^K (\tilde{x}_k^{(n)} + \varepsilon)^q. \end{aligned} \quad (35) \quad \square$$

**Referenced Claims** This section collects the justifications of a few facts that were mentioned in passing in the text, namely: 1) an additional property of the diversity, 2) a counterexample to the concavity of  $\|\cdot\|_{\mathbf{Z}, q}^q$ , and 3) the NP-hardness of (MinDiv) with  $\mathbf{Z} = \mathbf{I}$ .

1) We are concerned here with the effect on diversity of the merging of two communities.

**Proposition 6.** Let two communities be described by concentration vectors  $\mathbf{x} \in \Delta^N$  and  $\mathbf{x}' \in \Delta^N$ , respectively, and let  $t \in (0, \infty)$  represent the relative abundance of the second relative to the first. For  $q \in (0, 1)$ , the community obtained by merging these two communities, whose concentration vector is

$$\mathbf{x}'' = \frac{1}{1+t} \mathbf{x} + \frac{t}{1+t} \mathbf{x}', \quad (36)$$

has diversity bounded from above as

$$D_{\mathbf{Z}, q}(\mathbf{x}'') \leq \left[ \frac{1}{(1+t)^q} D_{\mathbf{Z}, q}(\mathbf{x})^{1-q} + \frac{t^q}{(1+t)^q} D_{\mathbf{Z}, q}(\mathbf{x}')^{1-q} \right]^{\frac{1}{1-q}} \quad (37)$$

and bounded from below, in case  $\|\cdot\|_{\mathbf{Z}, q}^q$  is concave, as

$$D_{\mathbf{Z}, q}(\mathbf{x}'') \geq \left[ \frac{1}{1+t} D_{\mathbf{Z}, q}(\mathbf{x})^{1-q} + \frac{t}{1+t} D_{\mathbf{Z}, q}(\mathbf{x}')^{1-q} \right]^{\frac{1}{1-q}}. \quad (38)$$

**Remark.** If the communities are disjoint and totally dissimilar, then (37) becomes an equality — this is the modularity result proved in [14, Prop. A10]. As for (38), in which equality obviously occurs when  $\mathbf{x} = \mathbf{x}'$ , it implies the intuitive result that  $D_{\mathbf{Z}, q}(\mathbf{x}'') \geq \min\{D_{\mathbf{Z}, q}(\mathbf{x}), D_{\mathbf{Z}, q}(\mathbf{x}')\}$ .

*Proof.* By subadditivity (see Lemma 1) and degree- $q$  homogeneity of  $\|\cdot\|_{\mathbf{Z},q}^q$ , we have

$$\|\mathbf{x}''\|_{\mathbf{Z},q}^q \leq \frac{1}{(1+t)^q} \|\mathbf{x}\|_{\mathbf{Z},q}^q + \frac{t^q}{(1+t)^q} \|\mathbf{x}'\|_{\mathbf{Z},q}^q, \quad (39)$$

and taking the  $1/(1-q)$ th power yields (37). Now, in case  $\|\cdot\|_{\mathbf{Z},q}^q$  is concave, we have

$$\|\mathbf{x}''\|_{\mathbf{Z},q}^q \geq \frac{1}{1+t} \|\mathbf{x}\|_{\mathbf{Z},q}^q + \frac{t}{1+t} \|\mathbf{x}'\|_{\mathbf{Z},q}^q, \quad (40)$$

and taking the  $1/(1-q)$ th power yields (38).  $\square$

**2)** We give here an example showing that  $\|\cdot\|_{\mathbf{Z},q}^q$  is not always concave on  $\mathbb{R}_+^N$  (hence  $D_{\mathbf{Z},q}$  is not always concave on  $\mathbb{R}_+^N$  either): we take  $N = 2$ ,  $q = 1/5$ ,  $\mathbf{Z} = \begin{bmatrix} 1 & 1/4 \\ 1/4 & 1 \end{bmatrix}$ , and

$$\mathbf{x} = \begin{bmatrix} 8 \\ 1.05 \end{bmatrix}, \quad \mathbf{x}' = \begin{bmatrix} 10 \\ 0.95 \end{bmatrix}, \quad \text{and } \mathbf{x}'' = \frac{1}{2}\mathbf{x} + \frac{1}{2}\mathbf{x}' = \begin{bmatrix} 9 \\ 1 \end{bmatrix}. \quad (41)$$

The nonconcavity follows from the easy computation

$$\|\mathbf{x}''\|_{\mathbf{Z},q}^q \approx 1.90768 \not\geq \frac{1}{2} \|\mathbf{x}\|_{\mathbf{Z},q}^q + \frac{1}{2} \|\mathbf{x}'\|_{\mathbf{Z},q}^q \approx \frac{1}{2} 1.90734 + \frac{1}{2} 1.90816 \approx 1.90775. \quad (42)$$

**3)** We explain here why the optimization program (MinDiv) is NP-hard when  $q \in (0, 1)$ . To this end, we claim that the minimization problem

$$\underset{\mathbf{x} \in \mathbb{R}^N}{\text{minimize}} \|\mathbf{x}\|_q^q = \sum_{j=1}^N |x_j|^q \quad \text{subject to } \mathbf{A}\mathbf{x} = \mathbf{y} \quad (43)$$

without nonnegativity constraint is essentially as ‘easy’ as the minimization problem

$$\underset{\mathbf{x} \in \mathbb{R}^N}{\text{minimize}} \|\mathbf{x}\|_q^q = \sum_{j=1}^N x_j^q \quad \text{subject to } \mathbf{A}\mathbf{x} = \mathbf{y} \text{ and } \mathbf{x} \geq 0 \quad (44)$$

with nonnegativity constraints — given that (43) is NP-hard, this implies that (44) is also NP-hard. To establish the claim, we show that if  $\tilde{\mathbf{z}} \in \mathbb{R}^{2N}$  denotes a solution to

$$\underset{\mathbf{z} \in \mathbb{R}^{2N}}{\text{minimize}} \sum_{j=1}^{2N} z_j^q \quad \text{subject to } [\mathbf{A} \mid -\mathbf{A}]\mathbf{z} = \mathbf{y} \text{ and } \mathbf{z} \geq 0, \quad (45)$$

then  $\tilde{\mathbf{x}} := \tilde{\mathbf{z}}_{[1:N]} - \tilde{\mathbf{z}}_{[N+1:2N]} \in \mathbb{R}^N$  is a solution to (43). Indeed, let us consider  $\mathbf{x} \in \mathbb{R}^N$  such that  $\mathbf{A}\mathbf{x} = \mathbf{y}$  and let us prove that  $\|\tilde{\mathbf{x}}\|_q^q \leq \|\mathbf{x}\|_q^q$ . Let us decompose  $\mathbf{x}$  as  $\mathbf{x} = \mathbf{x}^+ - \mathbf{x}^-$  where  $\mathbf{x}^+, \mathbf{x}^- \in \mathbb{R}^N$  are nonnegative and disjointly supported. Noticing that  $[\mathbf{x}^+; \mathbf{x}^-] \in \mathbb{R}^{2N}$  is feasible for (45), since  $[\mathbf{A} \mid -\mathbf{A}][\mathbf{x}^+; \mathbf{x}^-] = \mathbf{A}\mathbf{x}^+ - \mathbf{A}\mathbf{x}^- = \mathbf{A}\mathbf{x} = \mathbf{y}$  and  $[\mathbf{x}^+; \mathbf{x}^-] \geq 0$ , we have

$$\sum_{j=1}^{2N} \tilde{z}_j^q \leq \sum_{j=1}^N (x_j^+)^q + \sum_{j=1}^N (x_j^-)^q = \sum_{j=1}^N |x_j|^q = \|\mathbf{x}\|_q^q. \quad (46)$$

Besides, by subadditivity of  $\|\cdot\|_q^q$ , we also have

$$\|\tilde{\mathbf{x}}\|_q^q \leq \|\tilde{\mathbf{z}}_{[1:N]}\|_q^q + \|\tilde{\mathbf{z}}_{[N+1:2N]}\|_q^q = \sum_{j=1}^{2N} \tilde{z}_j^q. \quad (47)$$

It follows that  $\|\tilde{\mathbf{x}}\|_q^q \leq \|\mathbf{x}\|_q^q$ , as announced.
